# Supplementary material for: A 3D anatomical atlas of appendage musculature in the chelicerate arthropod Limulus polyphemus
Source: PubMed Central journal article supplement (PMC5812571; doi:10.1371/journal.pone.0191400), 2018-02-14

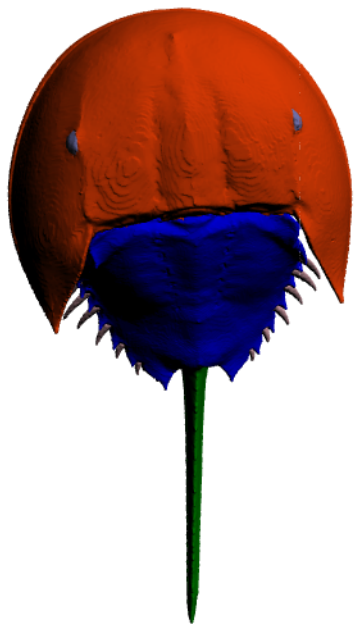

Supplement: pone.0191400.s001.pdf [file pone.0191400.s001.pdf]
